# Supplementary material for: Ruptures of mixed lipid monolayers under tension and supercooling: implications for nanobubbles in plants
Source: Royal Society of Chemistry journal article supplement (doi:10.1039/d4na00316k), 2024-01-01
Supplement: d4na00316k1.pdf [file d4na00316k1.pdf]

Supplementary Information for:  
Ruptures of Mixed Lipid Monolayers Under Tension and  
Supercooling: Implications for Nanobubbles in Plants

Stephen Ingram<sup>a</sup>, Bernhard Reischl<sup>a</sup>, Timo Vesala<sup>a,b</sup> and Hanna Vehkamäki<sup>a</sup>

<sup>a</sup>Institute for Atmospheric and Earth System Research/Physics,  
Faculty of Science, P.O. Box 64,

<sup>b</sup>Institute for Atmospheric and Earth System Research/Forest Sciences,  
Faculty of Agriculture and Forestry, P.O. Box 27,  
University of Helsinki,  
Helsinki, FI-00014 Finland

stephen.ingram@helsinki.fi  
hanna.vehkamaki@helsinki.fi

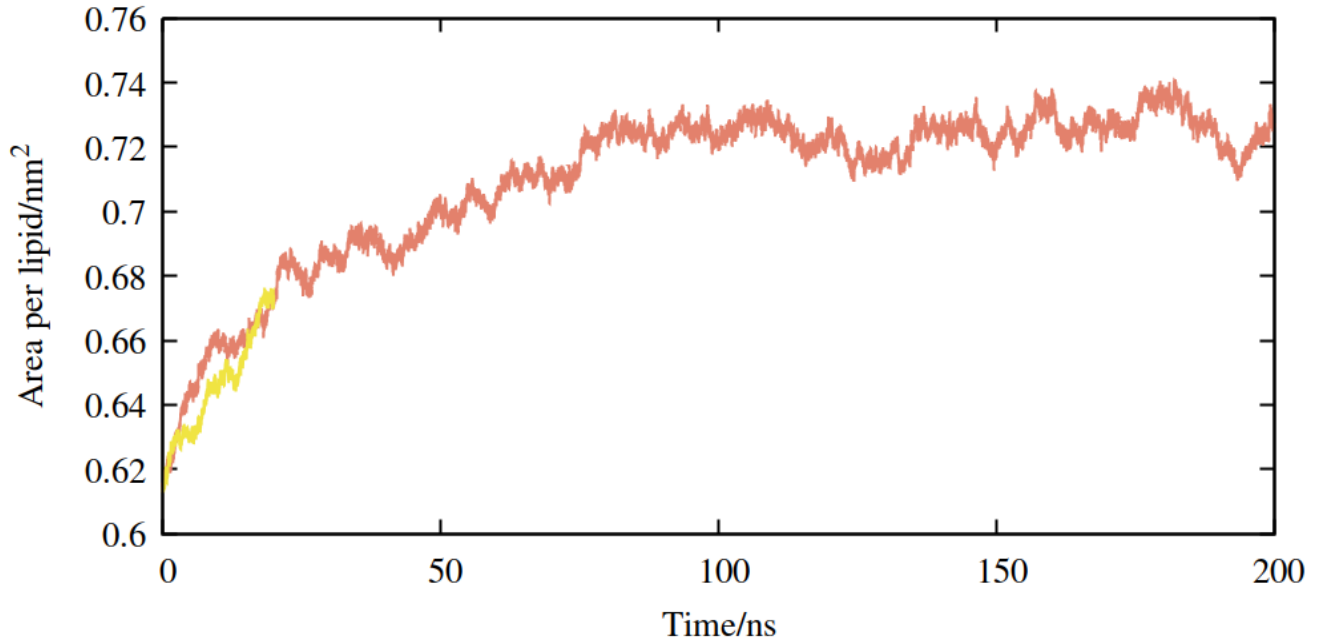

Figure S1: Expansion of the mixed monolayer at  $T = 270$  K and  $p = -2.5$  MPa. Two simulations are presented, with the same starting coordinates, but differing random seeds for velocity generation. Yellow data is the same as that presented in the second trajectory of Figure 3 in the main text.

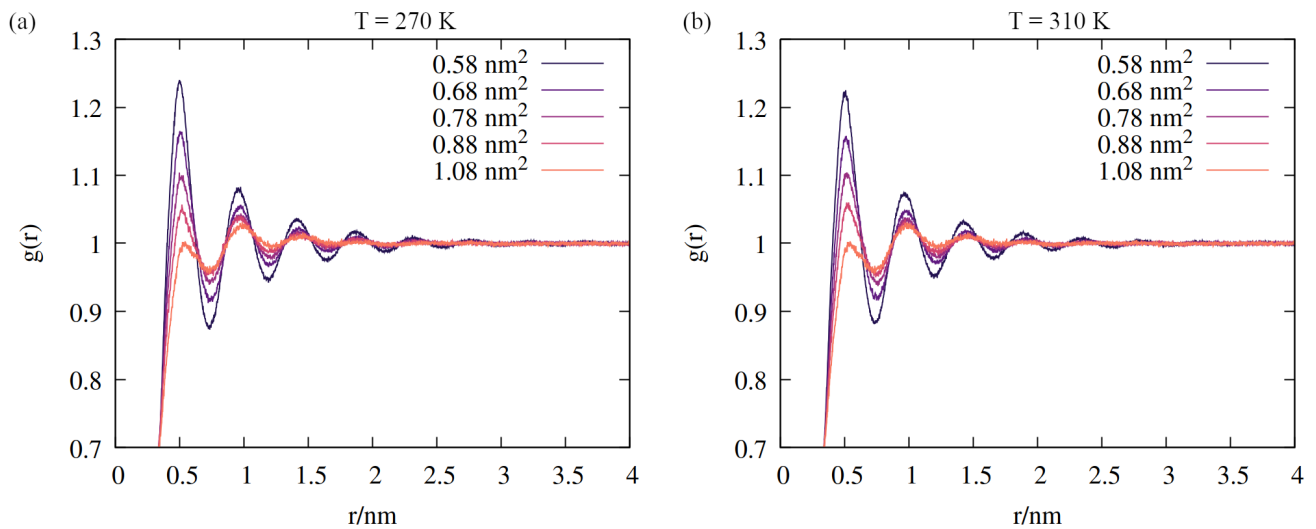

Figure S2: Two dimensional radial distribution functions (RDFs) of lipid tail group atoms, at increasing areas per lipid. (a)  $T = 270$  K and (b)  $T = 270$  K. RDFs were calculated using the same atomic coordinates as those presented in Figure 4 in the main text, output every 10 ps between  $t = 10$  and 60 ns.

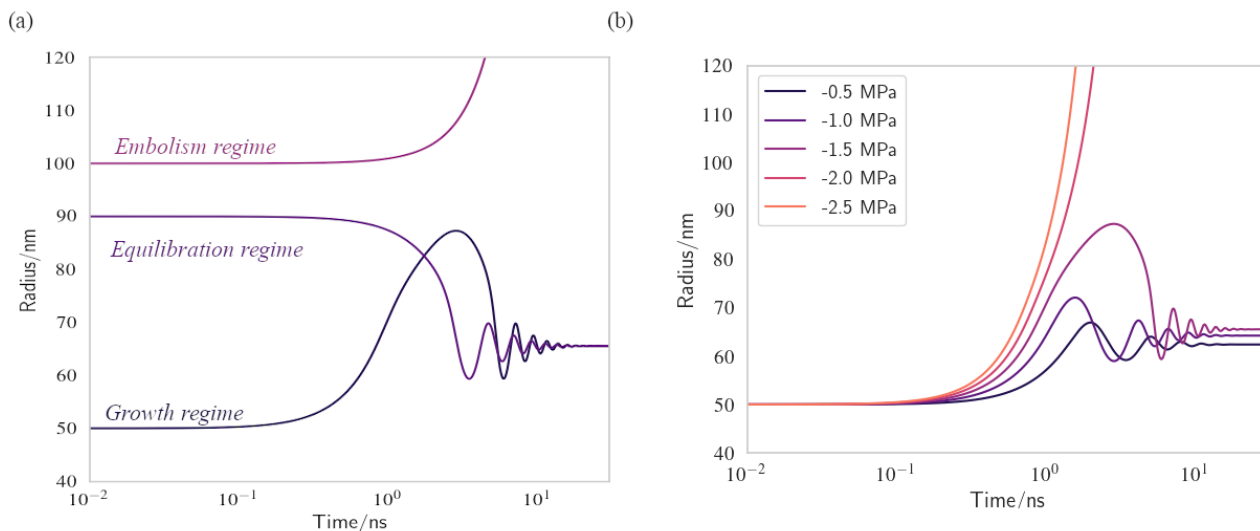

Figure S3: Bubble dynamics produced by integration of the Rayleigh-Plesset equation (Eq. 7), assuming  $T = 310$  K,  $N_{\text{lipids}} = 10^5$ , and a dynamic surface tension  $\gamma(r)$ . (a)  $p = -1.5$  MPa, with varying starting radii,  $r_0$ . (b)  $r_0 = 50$  nm, with varying external negative pressure,  $p$ . Further details in main text and Methods.

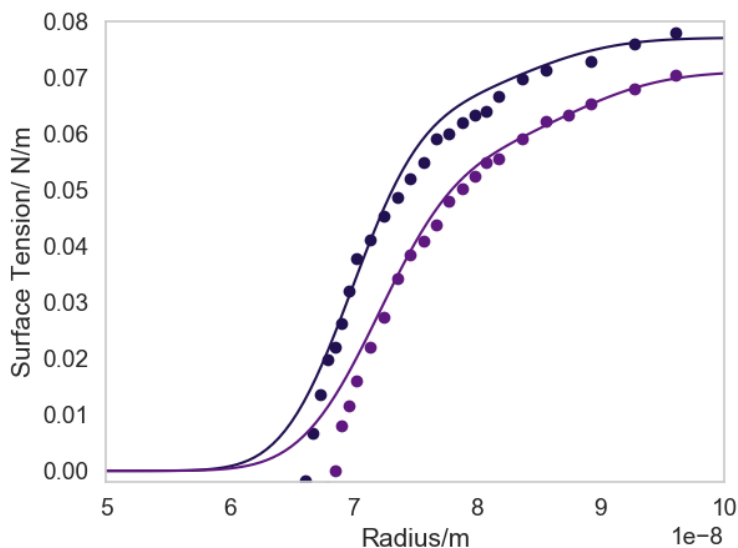

Figure S4: Smoothed parameterisations of the calculated surface tensions,  $\gamma_{\text{MD}}(T)$ , as a function of radius,  $r$ , where  $r = \sqrt{(APL \cdot N_{\text{Lipids}})/4\pi}$ . Purple points and lines are at  $T = 310$  K, black are at  $T = 270$  K.
